# Supplementary material for: Selective influence of Sox2 on POU transcription factor binding in embryonic and neural stem cells
Source: PubMed Central journal article supplement (PMC4576985; doi:10.15252/embr.201540467), 2015-09-02
Supplement: embr0016-1177-sd1.pdf [file embr0016-1177-sd1.pdf]

## **Selective influence of Sox2 on POU transcription factor binding in embryonic and neural stem cells**

Tapan Kumar Mistri et al. 2015

### **Table of contents:**

| <b>Content</b>                                                                       | <b>Page(s)</b> |
|--------------------------------------------------------------------------------------|----------------|
| Appendix Figures S1-S3 and legends                                                   | 2-5            |
| 1. Functional characterization of fluorescent protein fusions of Oct4, Sox2 and Oct6 | 2-3            |
| 2. Comparison of theoretical models for best fit to FCS data                         | 4              |
| 3. Enriched Sox2 and POU TF motifs in ChIP-Seq data                                  | 5              |
| Appendix Table S1: Oligonucleotides for analysis of Sox/Oct, PORE, and MORE motifs   | 6              |
| Appendix Table S2: Oligonucleotides used for qPCR                                    | 7              |
| References                                                                           | 8              |

## Appendix Figure S1

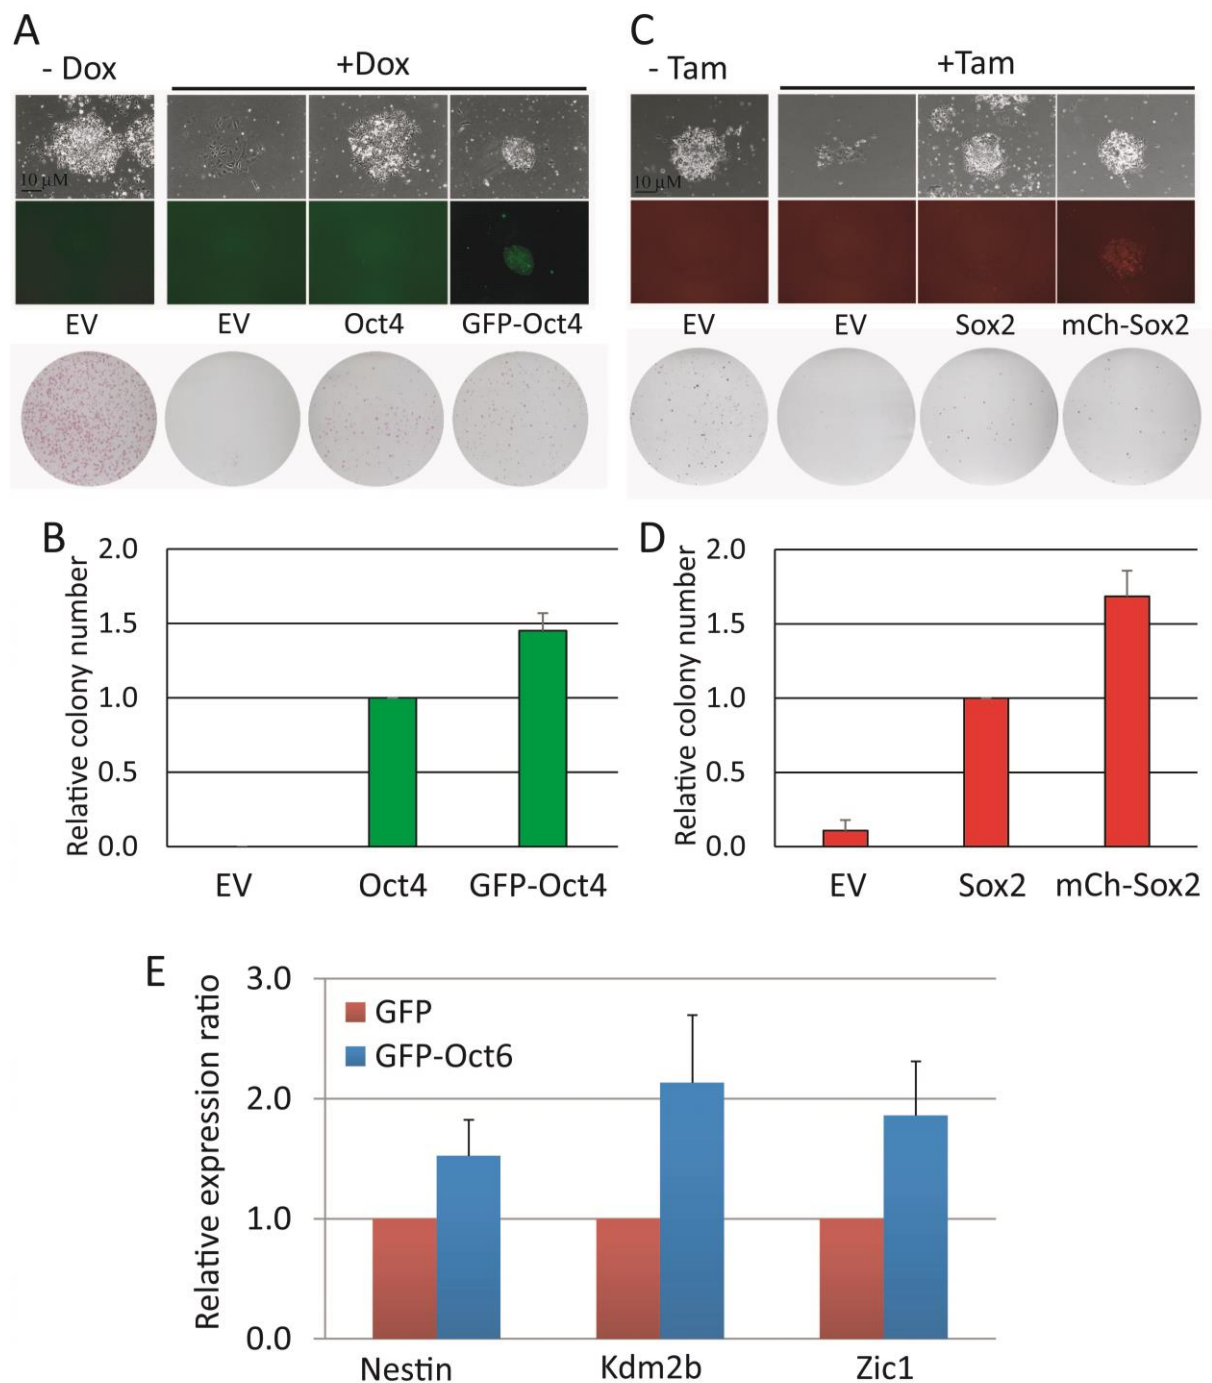

**Appendix Figure S1: Functional characterization of fluorescent protein fusions of Oct4, Sox2 and Oct6.** (A) ZHBTc4 ES cells, which lack endogenous Oct4 but contain a doxycycline (Dox) suppressible Oct4 transgene, were used to functionally test the GFP-Oct4 fusion protein. In the presents of Dox ES cells differentiate would normally differentiate. Representative morphologies of colonies

formed in the presence of Dox (1 $\mu$ g/ml) and after transfecting with Oct4 (pPyCAG-Oct4-IP), GFP-Oct4 (pPyCAG-GFP-Oct4-IP), or empty vector (pPyCAG-IP) are shown (top). Colonies were stained for alkaline phosphate activity (bottom). **(B)** Quantitation of colony morphologies from alkaline phosphate stained plates shown in (A). **(C)** SCKO cells, in which loxP-flanked Sox2 can be deleted in response to Tamoxifen (Tam)-inducible Cre-ERT<sup>2</sup> activity and led to differentiation, are assessed for their ES cell colony forming ability after transfection. Representative morphologies of colonies formed in the presence of Tam (1 $\mu$ g/ml) by cells transfected with Sox2 (pPyCAG-Sox2-IH), mCherry-Sox2 (pPyCAG-mCherry-Sox2-IH), or empty vector (pPyCAG-IH) are shown (top). Colonies were stained for alkaline phosphate activity (bottom). 'mCh' stands for mCherry. **(D)** Quantitation of colony morphologies from alkaline phosphate stained plates shown in (C). **(E)** Relative expression level of two key Oct6 target genes (*Kdm2b* and *Zic1*) and the neural lineage marker *Nestin* by E14Tg2a cells transfected with GFP or GFP-Oct6. Expression level was normalised to *TBP*. All experiments above were performed in triplicate. (n = 3, mean  $\pm$  SD).

## Appendix Figure S2

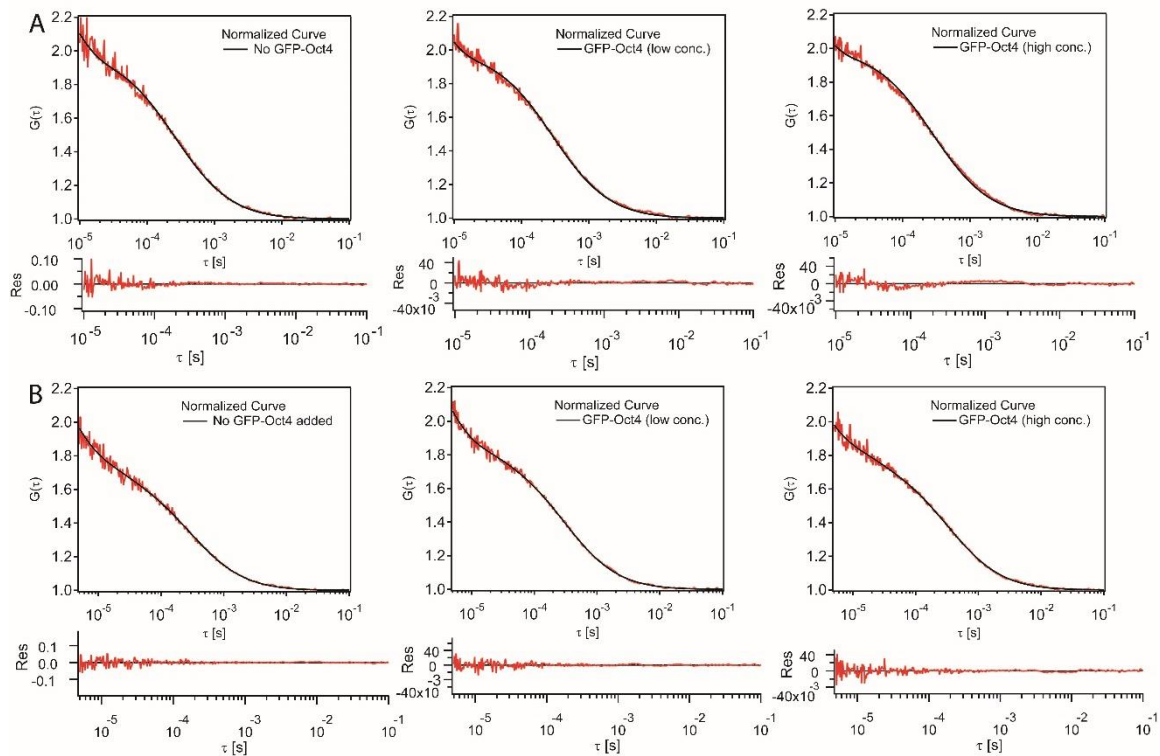

**Appendix Figure S2: Comparison of theoretical models for best fit to FCS data.** (A) A one-component coupled with a triplet state model (3D-1P-1T) used to fit three different ACFs generated from different protein concentration starting from zero (left panel), low (middle) to high (right panel) in a titration reaction with DNA. The attached residual illustrates the goodness of fitting by the model. (B) A two-component model (3D-2P-1T) used for fitting the above same ACFs resulting a better residual. The improved residual confirms that 3D-2P-1T is the better model for an ACF generated when protein was added to DNA. Protein-DNA Complex formation is well noticeable from the increased average diffusion time from  $273.0 \pm 2.9 \mu\text{s}$  in the absence of protein to  $320 \pm 5.2 \mu\text{s}$  at the maximum protein concentration.

## Appendix Figure S3

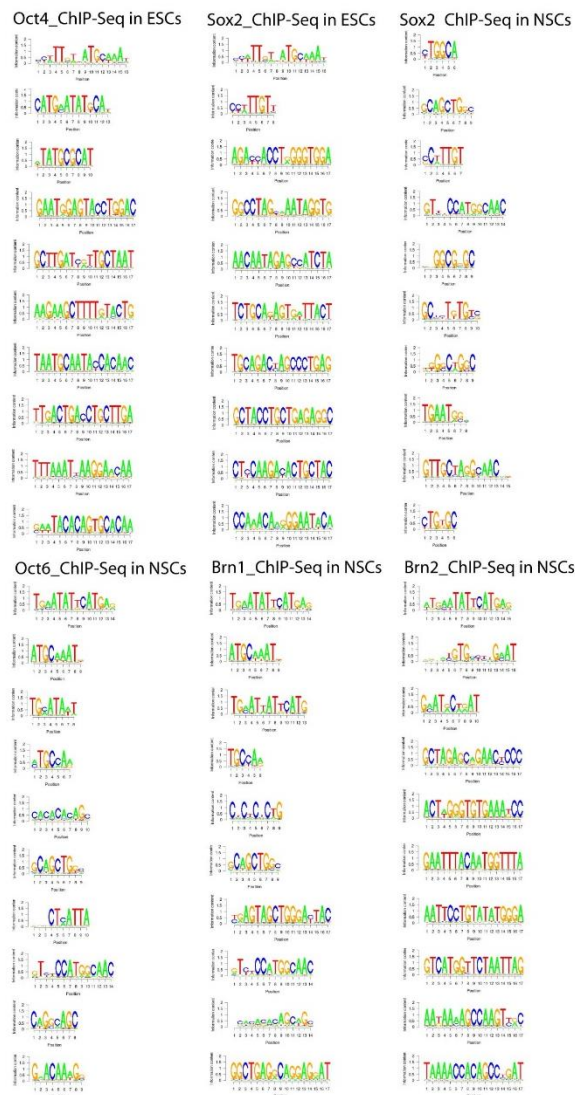

**Appendix Figure S3: Enriched Sox2 and POU TF motifs in CHIP-Seq data.** The top 10 motifs from Oct4, Sox2, Oct6, Brn1, and Brn2 CHIP-Seq data from E14 ESCs and NS5 NSCs are shown with WebLogo.

| Name             | Sequence                                           | Figure                    |      |
|------------------|----------------------------------------------------|---------------------------|------|
| SO wt            | TCCACCATGGACATTGTAATGCAAAAGAAGCTGTAAG              | 1, 2, 3, 7, EV1, EV2, EV3 |      |
| PORE wt          | AAGTTAAAATCACATTTGAAATGCAAATGGAAAAGC               | 1, 2, 4, 7, EV1,          |      |
| PORE mt          | AAGTTAAAATCACtgccaAAATGCAAATGGAAAAGC               | 1, 2, 4, 7, EV1,          |      |
| MORE wt          | TGATCACAGCCTCATGCATATGCATATATCGTTGTTG              | 4, 7                      |      |
| MORE mt          | TGATCACAGCCTCATGCATAcctgTATATCGTTGTTG              | 4                         |      |
| Artificial motif | AAATAATGGAAACCTTTGTATTTATGCAAATAAACAAAGGTC<br>ATTT | 1                         |      |
| fl mut           | TcgAccTCACATTTGAAATGCAAAT                          | EV1C                      |      |
| p1 mut           | TTAAAATCACAgacGAAATGCAAAT                          |                           |      |
| p2 mut           | TTAAAATCACATTTGAAATGCgctT                          |                           |      |
| fl p1 mut        | TcgAccTCACAgacGAAATGCAAAT                          |                           |      |
| fl p2 mut        | TcgAccTCACATTTGAAATGCgctT                          |                           |      |
| p1 p2 mut        | TTAAAATCACAgacGAAATGCgctT                          |                           |      |
| fl p1 p2 mut     | TcgAccTCACAgacGAAATGCgctT                          |                           |      |
| PORE             | TTAAAATCACATTTGAAATGCAAAT                          |                           |      |
| 5L>0             | TTAAAATCACATTTGCAAAT                               |                           | EV1D |
| 5L>1             | TTAAAATCACATTTG <u>A</u> CAAAT                     |                           |      |
| 5L>2             | TTAAAATCACATTTG <u>AA</u> CAAAT                    |                           |      |
| 5L>3             | TTAAAATCACATTTG <u>AAA</u> CAAAT                   |                           |      |
| 5L>4             | TTAAAATCACATTTG <u>AAAT</u> CAAAT                  |                           |      |
| PORE             | TTAAAATCACATTTGAAATGCAAAT                          |                           |      |
| L1,3 mut         | TTAAAATCACATTTGcAcTGCAAAT                          |                           |      |
| L3,5 mut         | TTAAAATCACATTTGAAgTaCAAAT                          |                           |      |
| L1-5 mut         | TTAAAATCACATTTGcgccaCAAAT                          |                           |      |

**Appendix Table S1: Oligonucleotides for analysis of Sox/Oct, PORE, and MORE motifs.** DNAs used are shown 5'-3'. The red colour indicates the Sox/Oct, PORE, and MORE motifs; mutations are marked by lower case (substitutions) or underling (insertion). The top six DNAs are Cy5 labeled at the 5' end (unless otherwise mentioned in the Figure legend); DNAs used in Figure 2 panels C, D are untagged. fl, P1 and P2 indicate oligonucleotides with mutations in the flanking sequence, palindromic repeat 1 and repeat 2, respectively.

| Primers    | Sequence               |
|------------|------------------------|
| Nestin-Frw | CTGCAGGCCACTGAAAAGT    |
| Nestin-Rev | TTCCAGGATCTGAGCGATCT   |
| Zic1-Frw   | AACCTCAAGATCCACAAAAGGA |
| Zic1-Rev   | CCTCGAACTCGCACTTGAA    |
| Kdm2b-Frw  | TCCACCCTGGATGCCTTA     |
| Kdm2b-Rev  | GCATGGTTACACTTCGGACA   |
| TBP-Frw    | GGGGAGCTGTGATGTGAAGT   |
| TBP-Rev    | CCAGGAAATAATTCTGCCTCA  |

**Appendix Table S2: Oligonucleotides used for qPCR.** DNAs used are shown 5'-3'. Primers for Nestin and Zic1 were described previously [1]. Primers for Kdm2b were designed using the *ROCHE Universal Probe Library Assay DesignCenter*.

**REFERENCES**

1. Zhu Q, Song L, Peng G, Sun N, Chen J, Zhang T, Sheng N, Tang W, Qian C, Qiao Y (2014) The transcription factor Pou3f1 promotes neural fate commitment via activation of neural lineage genes and inhibition of external signaling pathways. *ELife* **3**: e02224
2. Gagliardi A, Mullin NP, Ying Tan Z, Colby D, Kousa AI, Halbritter F, Weiss JT, Felker A, Bezstarosti K, Favaro R (2013) A direct physical interaction between Nanog and Sox2 regulates embryonic stem cell self-renewal. *The EMBO journal* **32**: 2231-2247
3. Niwa H, Miyazaki J-i, Smith AG (2000) Quantitative expression of Oct-3/4 defines differentiation, dedifferentiation or self-renewal of ES cells. *Nature genetics* **24**: 372-376
4. Niwa H, Masui S, Chambers I, Smith AG, Miyazaki J-i (2002) Phenotypic complementation establishes requirements for specific POU domain and generic transactivation function of Oct-3/4 in embryonic stem cells. *Molecular and cellular biology* **22**: 1526-1536
5. Andrews NC, Faller DV (1991) A rapid micropreparation technique for extraction of DNA-binding proteins from limiting numbers of mammalian cells. *Nucleic acids research* **19**: 2499
