# Supplementary material for: Selective influence of Sox2 on POU transcription factor binding in embryonic and neural stem cells
Source: PubMed Central journal article supplement (PMC4576985; doi:10.15252/embr.201540467), 2015-09-02

Figure 1

Fig. 1A, 1B

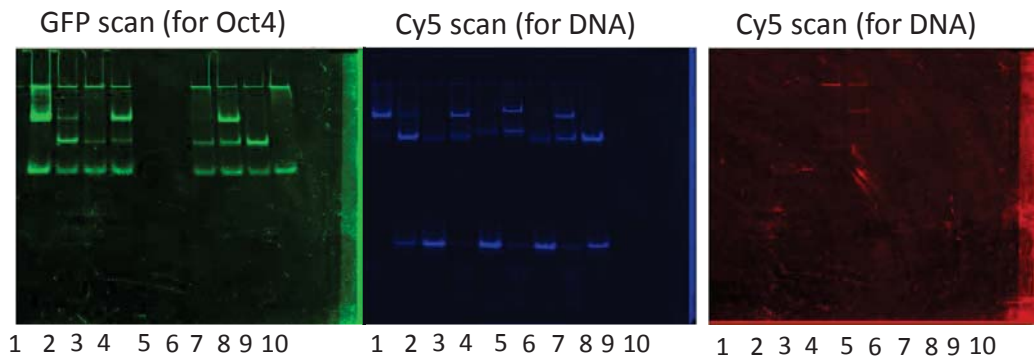

Lane 1-3: Fig1A  
Lane 4: GFP-Oct4+MORE  
Lane 5-6: Fig. EV1B  
Lane 7-10: Fig. 1A

Fig. 1C

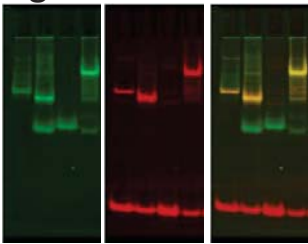

Fig. 1D

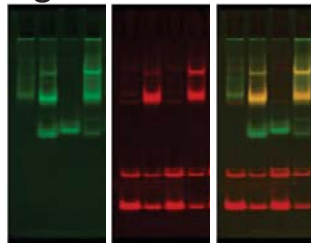

Supplement: embr0016-1177-sd5.pdf [file embr0016-1177-sd5.pdf]
