# Supplementary material for: Selective influence of Sox2 on POU transcription factor binding in embryonic and neural stem cells
Source: PubMed Central journal article supplement (PMC4576985; doi:10.15252/embr.201540467), 2015-09-02

Standard EMSA with Cy5 based gel scanning (DNA detection)

Oct4 + PORE-mt

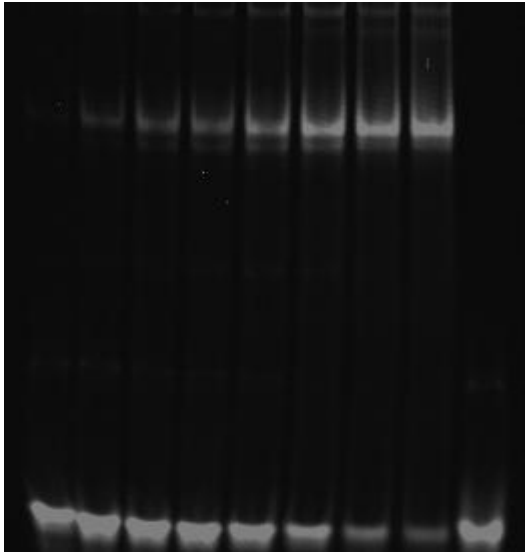

Oct4 + PORE-wt

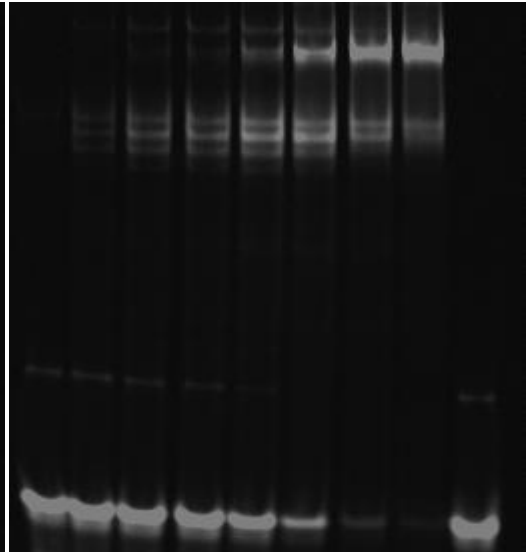

Oct4 + Cy5-SO

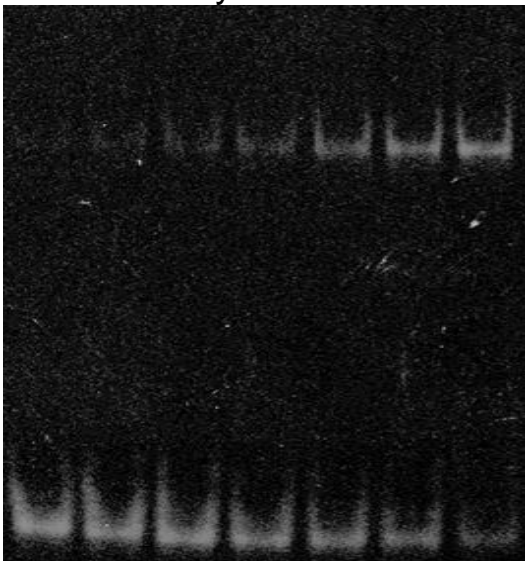

Oct4 + Sox2 + Cy5-SO

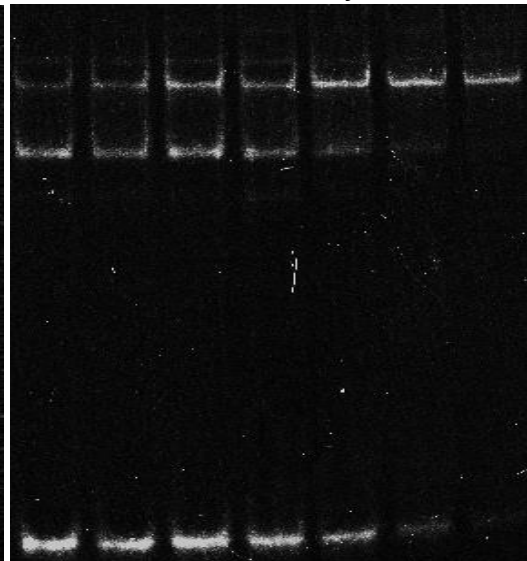

Supplement: embr0016-1177-sd6.pdf [file embr0016-1177-sd6.pdf]
