# Supplementary material for: Selective influence of Sox2 on POU transcription factor binding in embryonic and neural stem cells
Source: PubMed Central journal article supplement (PMC4576985; doi:10.15252/embr.201540467), 2015-09-02

**Fig. 3A**

Titration of GFP-Oct6 in the absence of mCherry-Sox2

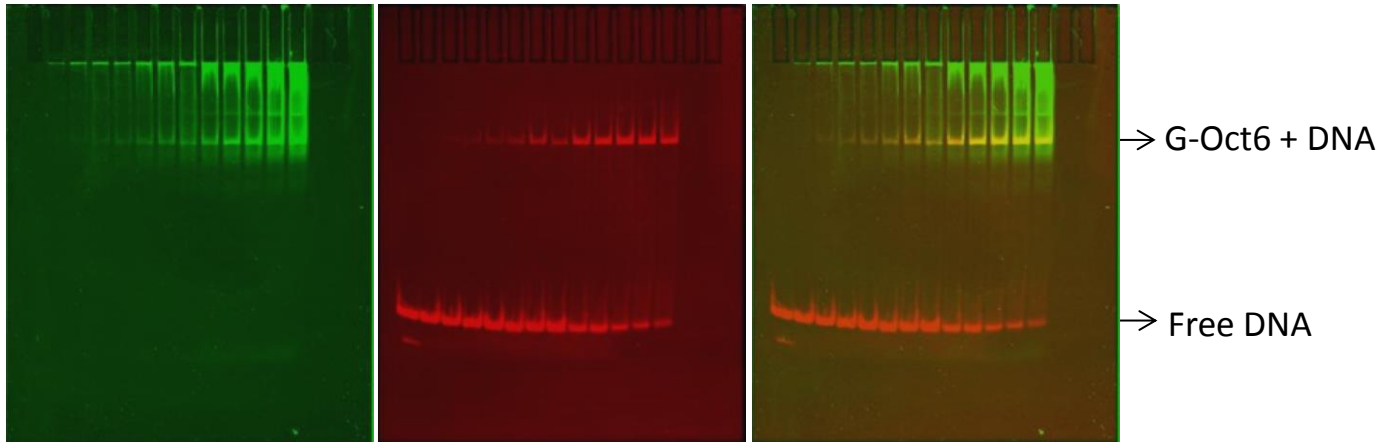

**Fig. 3B**

Titration of GFP-Oct6 in the presence of mCherry-Sox2

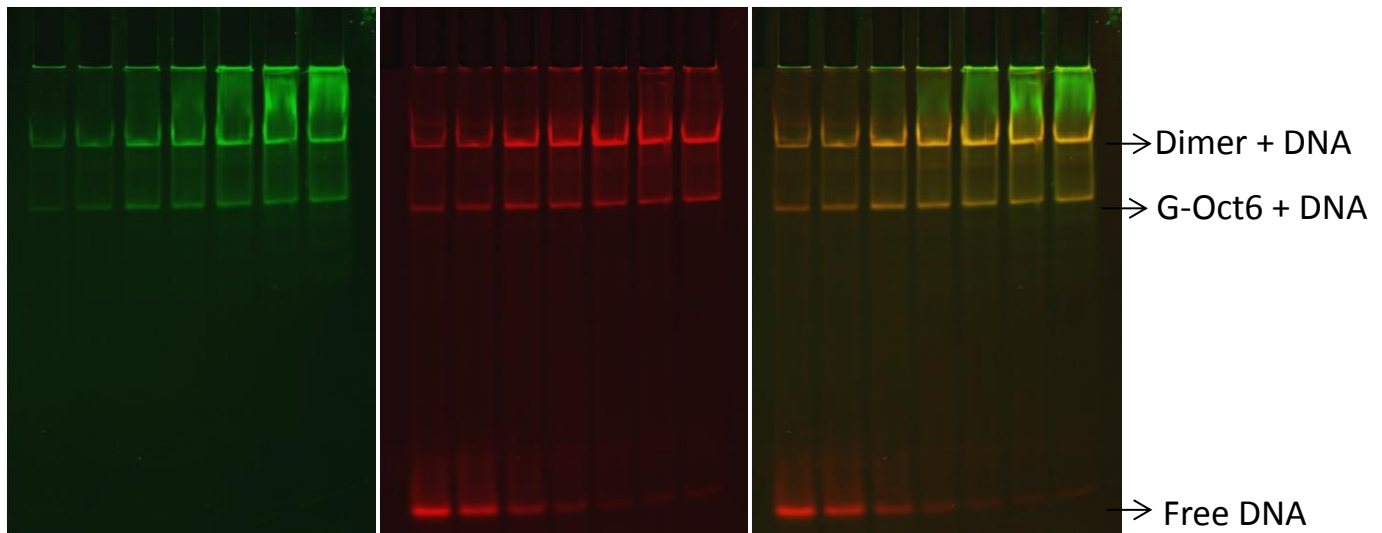

Supplement: embr0016-1177-sd7.pdf [file embr0016-1177-sd7.pdf]
