# Supplementary material for: Selective influence of Sox2 on POU transcription factor binding in embryonic and neural stem cells
Source: PubMed Central journal article supplement (PMC4576985; doi:10.15252/embr.201540467), 2015-09-02

**Fig 4A**

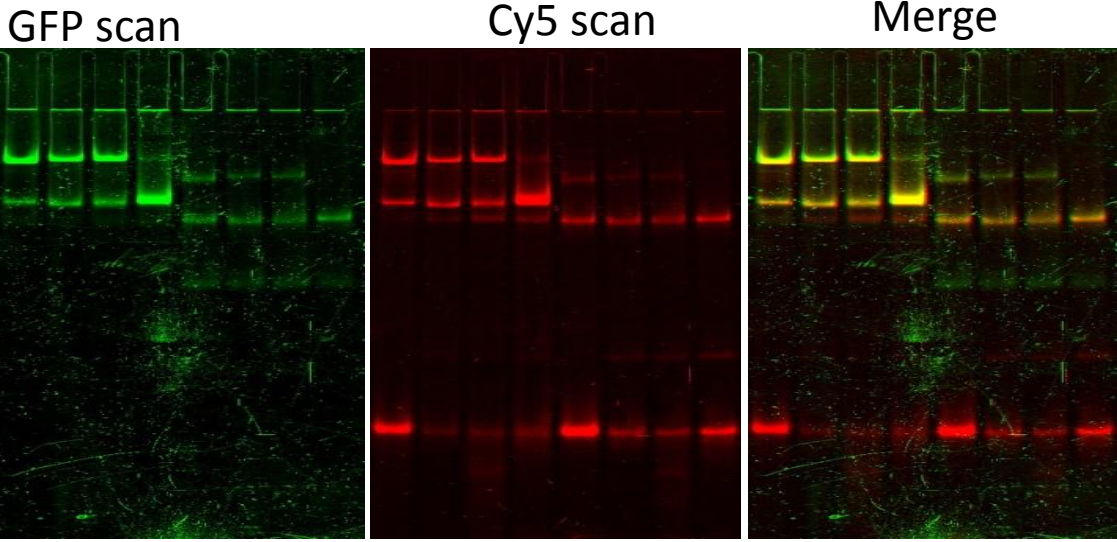

**Fig 4B**

**Standard EMSA with Cy5 based gel scanning (DNA detection)**

Oct6 + Cy5-PORE

Oct4 + Cy5-MORE

Oct6+Cy5-MORE

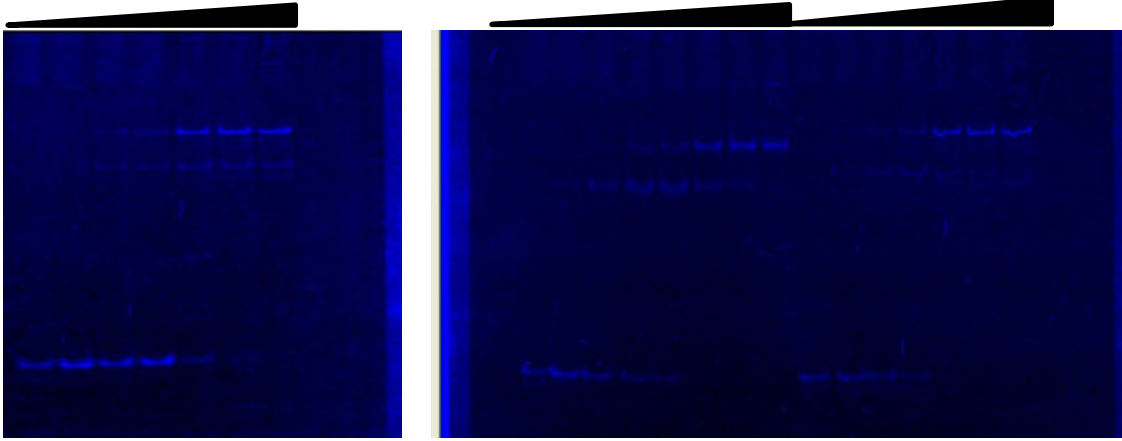

Oct6+Cy5-PORE mutant

Oct6+Cy5-MORE mutant

Oct4 + Cy5-MORE mutant

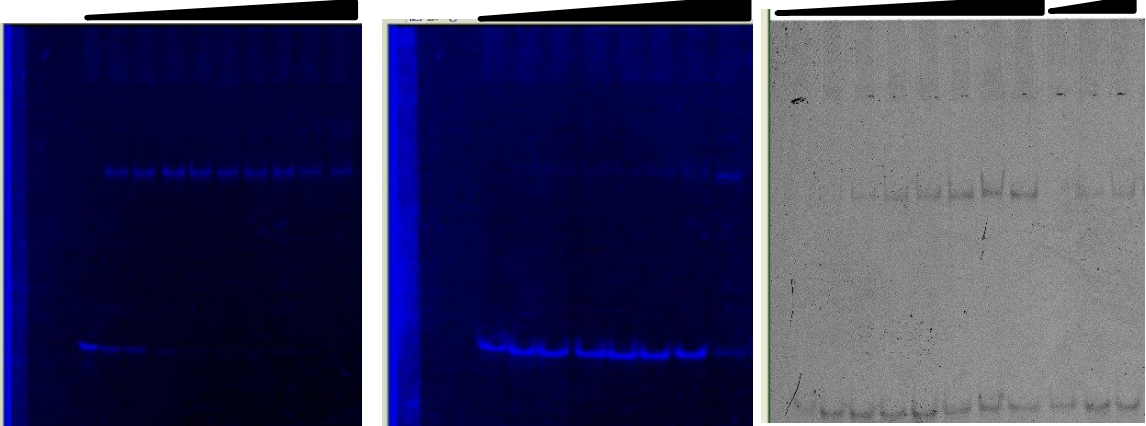

Supplement: embr0016-1177-sd8.pdf [file embr0016-1177-sd8.pdf]
