# Supplementary material for: Selective influence of Sox2 on POU transcription factor binding in embryonic and neural stem cells
Source: PubMed Central journal article supplement (PMC4576985; doi:10.15252/embr.201540467), 2015-09-02

Fig. 6A

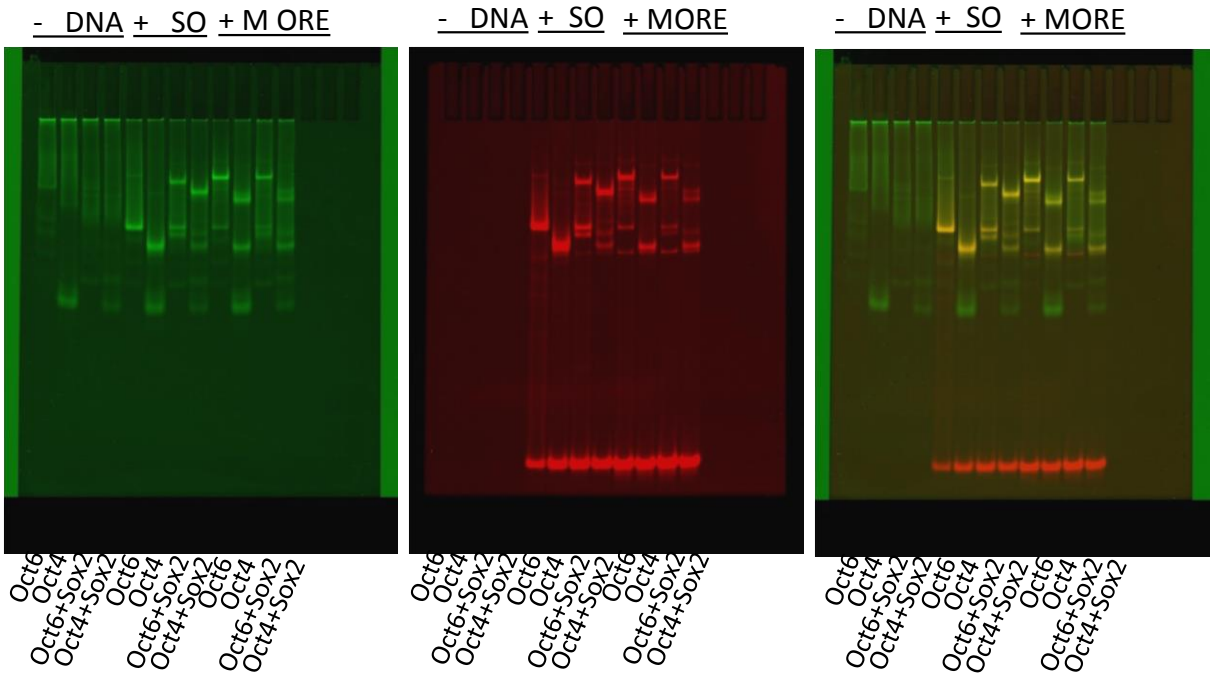

PORE panel of Fig. 6A and Fig. 6B

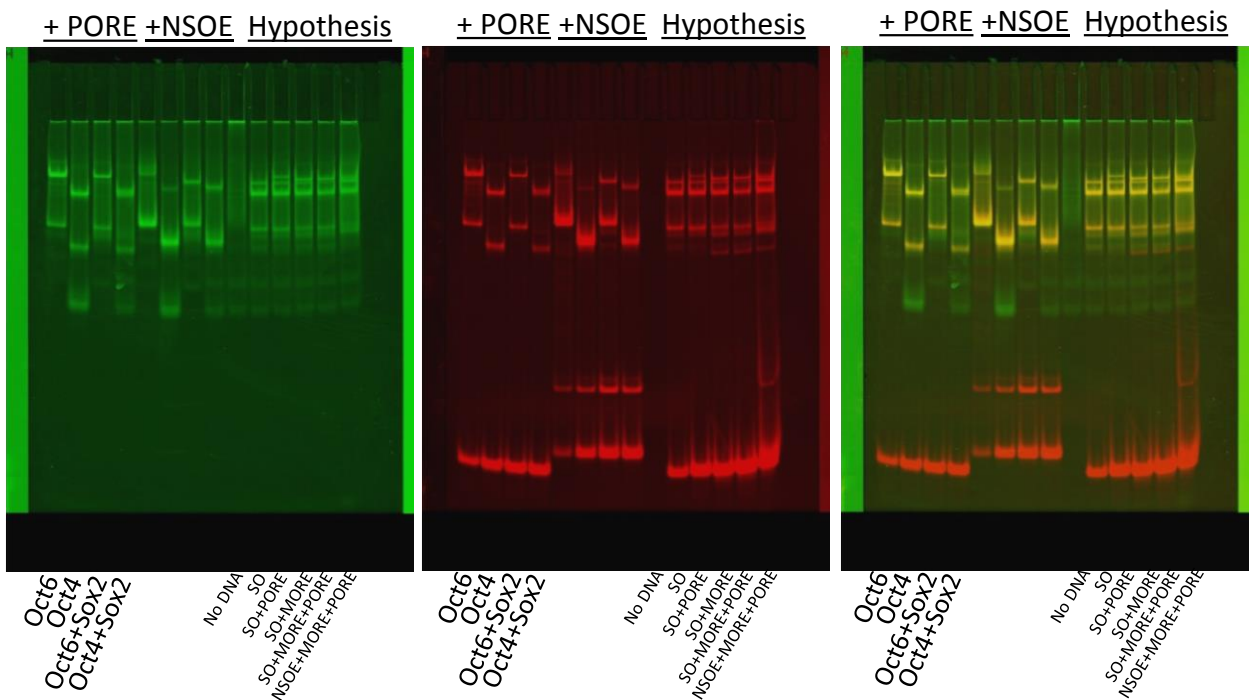

Supplement: embr0016-1177-sd9.pdf [file embr0016-1177-sd9.pdf]
